# Supplementary material
Source: Springer Nature journal article supplement (https://www.springermedizin.de/resource/supplementary/12990_2013_598_MOESM20_ESM.pdf/9613590)

Ipsilateral to the GMCSF injected paw

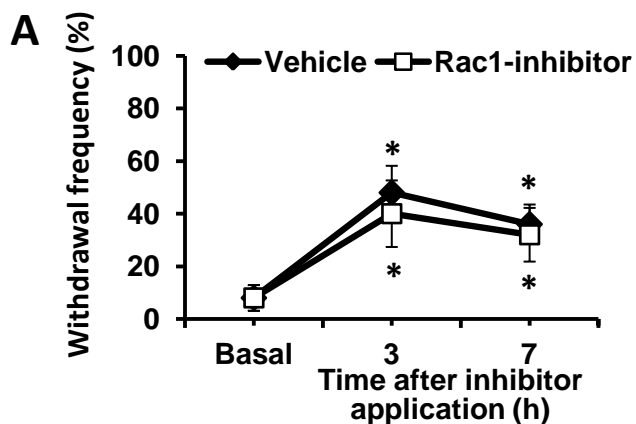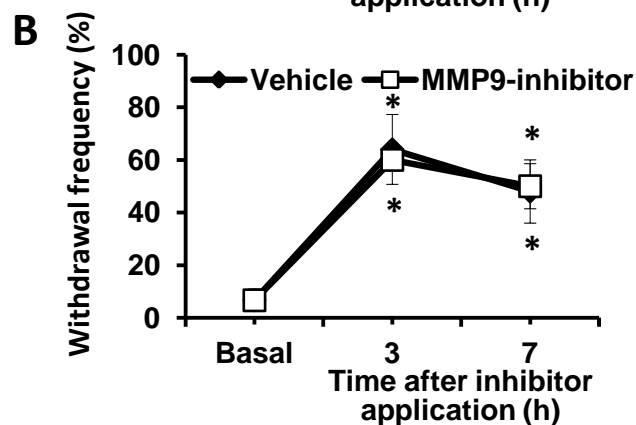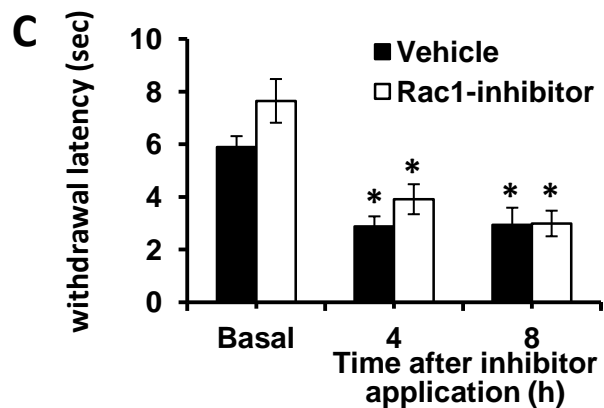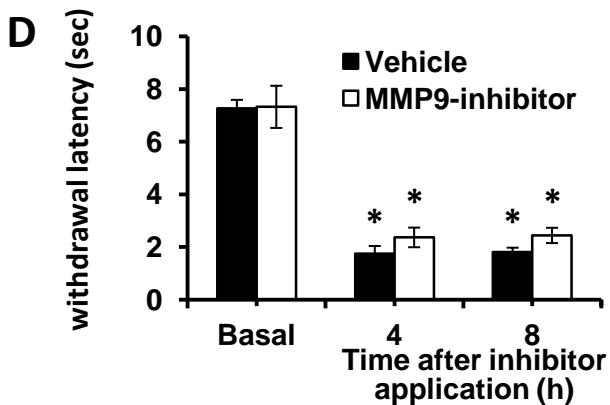

Contralateral to the GMCSF injected paw

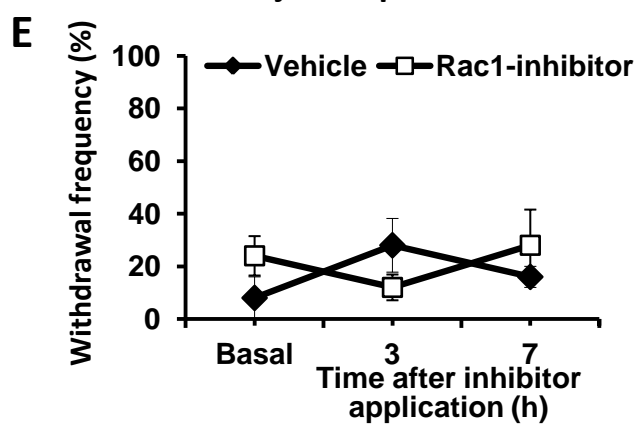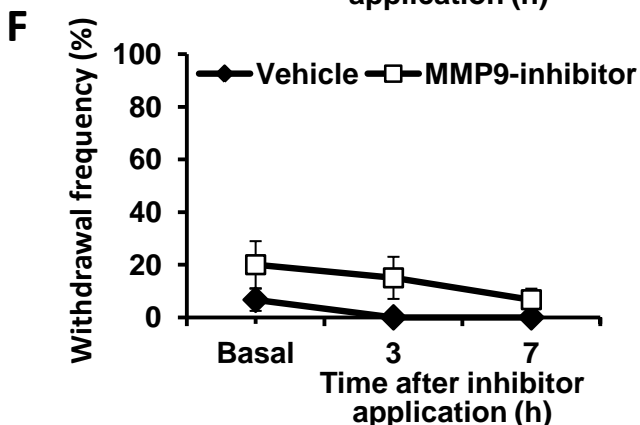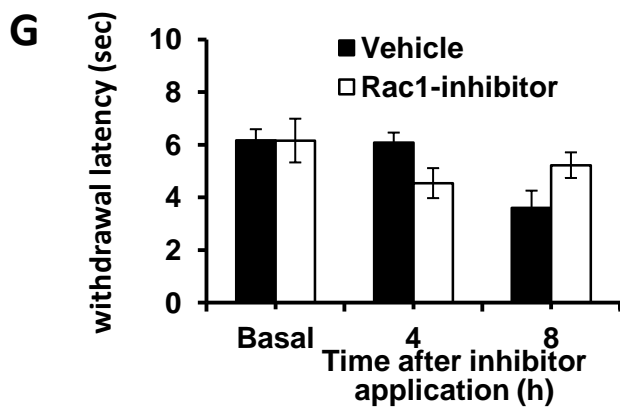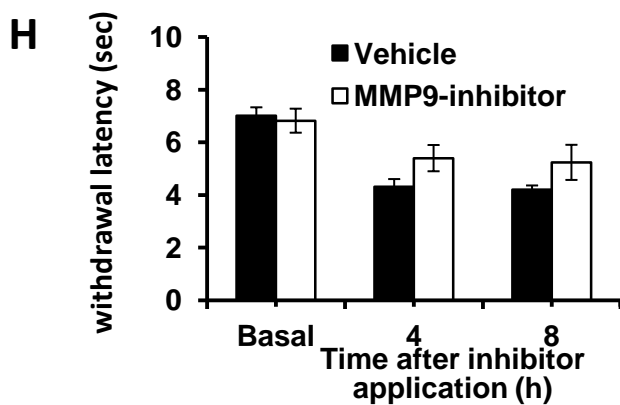

Supplement: MOESM20 [file 9613590]
